# Supplementary material for: Association between non-HDLC and 1-year prognosis in patients with spontaneous intracerebral haemorrhage: a prospective cohort study from 13 hospitals in Beijing
Source: HighWire-hosted journal article supplement (doi:10.1136/bmjopen-2022-061241), 2022-11-01
Supplement: bmjopen-2022-061241supp001_data_supplement.pdf [file bmjopen-2022-061241supp001_data_supplement.pdf]

**Supplementary Table 1.** Odds ratios and 95% CI for 1-year poor outcome (mRS  $\geq 3$ ) according to non-HDLc quartiles.

|                            | non-HDLc quartiles |                   |                   |                   | Continuous scale  | P for trend |
|----------------------------|--------------------|-------------------|-------------------|-------------------|-------------------|-------------|
|                            | Q1                 | Q2                | Q3                | Q4                |                   |             |
| 1-year poor outcome, n (%) | 71 (43.3)          | 58 (34.5)         | 54 (32.3)         | 40 (24.0)         |                   |             |
| Univariate analysis        | Ref.               | 0.69 (0.44, 1.08) | 0.63 (0.40, 0.98) | 0.41 (0.26, 0.66) | 0.76 (0.66, 0.88) | <0.001      |
| Multivariate analysis      |                    |                   |                   |                   |                   |             |
| Model 1                    | Ref.               | 0.80 (0.50, 1.29) | 0.84 (0.52, 1.36) | 0.57 (0.35, 0.95) | 0.85 (0.73, 1.00) | 0.049       |
| Model 2                    | Ref.               | 0.81 (0.44, 1.50) | 1.03 (0.56, 1.90) | 0.71 (0.37, 1.37) | 0.93 (0.76, 1.14) | 0.468       |
| Sensitivity analysis       | Ref.               | 0.83 (0.43, 1.60) | 1.14 (0.60, 2.18) | 0.76 (0.39, 1.51) | 0.96 (0.77, 1.18) | 0.673       |

Data are OR (95% CI) unless otherwise stated.

Model 1 adjusted for age and sex.

Model 2 adjusted for variates in model 1 plus prior mRS scale (<3 or  $\geq 3$ ) history of ICH, glucose on admission, WBC on admission, baseline hematoma volume, hematoma location, time from onset to initial non-contrast CT, GCS score at admission, systolic blood pressure.

Sensitivity analysis was performed in ICH patients without statin use after admission (n=589), and adjusted for variates in model 2.
